# Supplementary material
Source: PubMed Central journal article supplement (PMC10352924)
Supplement: jamapediatr-e232300-s001.pdf [file jamapediatr-e232300-s001.pdf]

## Data Sharing Statement

Tolliver. Characterizing Racial Disparities in Emergency Department Pediatric Physical Restraint by Sex and Age. *JAMA Pediatr*. Published July 17, 2023.  
doi:10.1001/jamapediatrics.2023.2300

### Data

**Data available:** No
